# Supplementary material for: A novel approach to assessing bisphenol-A hazards using an in vitro model system
Source: PubMed Central journal article supplement (PMC4977886; doi:10.1186/s12864-016-2979-5), 2016-08-09
Supplement: 12864_2016_2979_MOESM1_ESM.pdf [file 12864_2016_2979_MOESM1_ESM.pdf]

**Additional file 1. Supplementary table 1****Table S1:** Peptide sequence, matches peptides, and searching engines of identified proteins.

| <b>Symbol</b> | <b>Peptide</b>                           | <b>Matched peptide</b> | <b>Search engine (database)</b> |
|---------------|------------------------------------------|------------------------|---------------------------------|
| ATP5H         | R.LASLSEKPPAIDWAYYR.A                    | 606.6                  | MASCOT<br>(NCBIInr)             |
| ATP5O         | P.PVQVYGIEGR.Y                           | 528.3                  | FASTA<br>(UniProtKB)            |
| HADHA         | E.YLEEVAVNFAK.G                          | 813.4                  | FASTA<br>(UniProtKB)            |
| COX6A1        | K.ALTYFVALPGVGVSMNLNVFLK.S               | 752.4                  | MASCOT<br>(SwissProt)           |
| PGAM2         | R.ALPFWNEEIAPK.I                         | 707.8                  | MASCOT<br>(SwissProt)           |
| OXCT2A        | K.GLTLVELWEGSSVDDIK.A                    | 930.9                  | MASCOT<br>(SwissProt)           |
| ISOC2A        | S.SILFLCDLQEK.F                          | 953.3                  | FASTA<br>(UniProtKB)            |
| GAPDH         | K.LVAWYDNEYGYSNR.V                       | 875.4                  | MASCOT<br>(SwissProt)           |
| AK2           | K.LVSDEMVELIEK.N<br>K.LDSVIEFSIQDSSLIR.R | 760.4, 924.5           | MASCOT<br>(NCBIInr)             |
| SDHB          | K.LQDPFSVYR.C                            | 562.8                  | FASTA                           |

|         |                       |              |             |
|---------|-----------------------|--------------|-------------|
|         |                       |              | (UniProtKB) |
| UQCRFS1 | A.TTTVGVAYAAK.N       | 683.3        | FASTA       |
|         |                       |              | (UniProtKB) |
| ROPN1   | R.FTEEIEWLK.F         | 528.6,       | MASCOT      |
|         | R.LIIHADELAQMWK.V     | 579.9,597.8, | (NCBIInr)   |
|         | K.IVCEVLSSDHDGGPPR.I  | 974.5        |             |
|         | R.MLNYIEQEVIGPDGLIK.V |              |             |
| ACTB    | R.AVFPSIVGRPR.Q       | 599.8, 895.9 | MASCOT      |
|         | K.SYELPDGQVITIGNER.F  |              | (SwissProt) |
| FABP9   | M.IEPFLGTWK.L         | 619.3, 827.4 | MASCOT      |
|         | K.SLITFEGGSMIQVQK.W   |              | (SwissProt) |
| ODF2    | R.QFQSQLADLQQLPDILK.I | 993.0        | MASCOT      |
|         |                       |              | (NCBIInr)   |
| PMP20   | K.ATDLLLDDSLVSLFGNR.R | 924.9        | MASCOT      |
|         |                       |              | (NCBIInr)   |
| ASRGL1  | K.TVEEAAQLALDYMK.S    | 791.3        | MASCOT      |
|         |                       |              | (SwissProt) |

---

|        |                          |              |             |
|--------|--------------------------|--------------|-------------|
| PHB    | K.AAELIANSLATAGDGLIELR.K | 575.3, 999.5 | MASCOT      |
|        | R.FDAGELITQR.E           |              | (NCBIInr)   |
| PPP1CA | R.EIFLSQPILLELEAPLK.I    | 977.5        | MASCOT      |
|        |                          |              | (SwissProt) |
| DNAL1  | K.LYAQIPPIEK.M           | 586.3        | FASTA       |
|        |                          |              | (UniProtKB) |
| SPA17  | R.IPQGFGNLLEGLTR.E       | 757.9        | MASCOT      |
|        |                          |              | (NCBIInr)   |
| GSTM5  | K.LTFVDFLTYDVLDQNR.M     | 980.0        | MASCOT      |
|        |                          |              | (NCBIInr)   |
| GPX4   | N.YTQLVDLHAR.Y           | 548.9        | FASTA       |
|        |                          |              | (UniProtKB) |
| PRDX5  | R.LLADPTGAFGK.A          | 545.2        | FASTA       |
|        |                          |              | (UniProtKB) |

---
