# Supplementary material for: A novel approach to assessing bisphenol-A hazards using an in vitro model system
Source: PubMed Central journal article supplement (PMC4977886; doi:10.1186/s12864-016-2979-5), 2016-08-09
Supplement: 12864_2016_2979_MOESM2_ESM.pdf [file 12864_2016_2979_MOESM2_ESM.pdf]

## Additional file 2. Supplementary figures 1 to 3

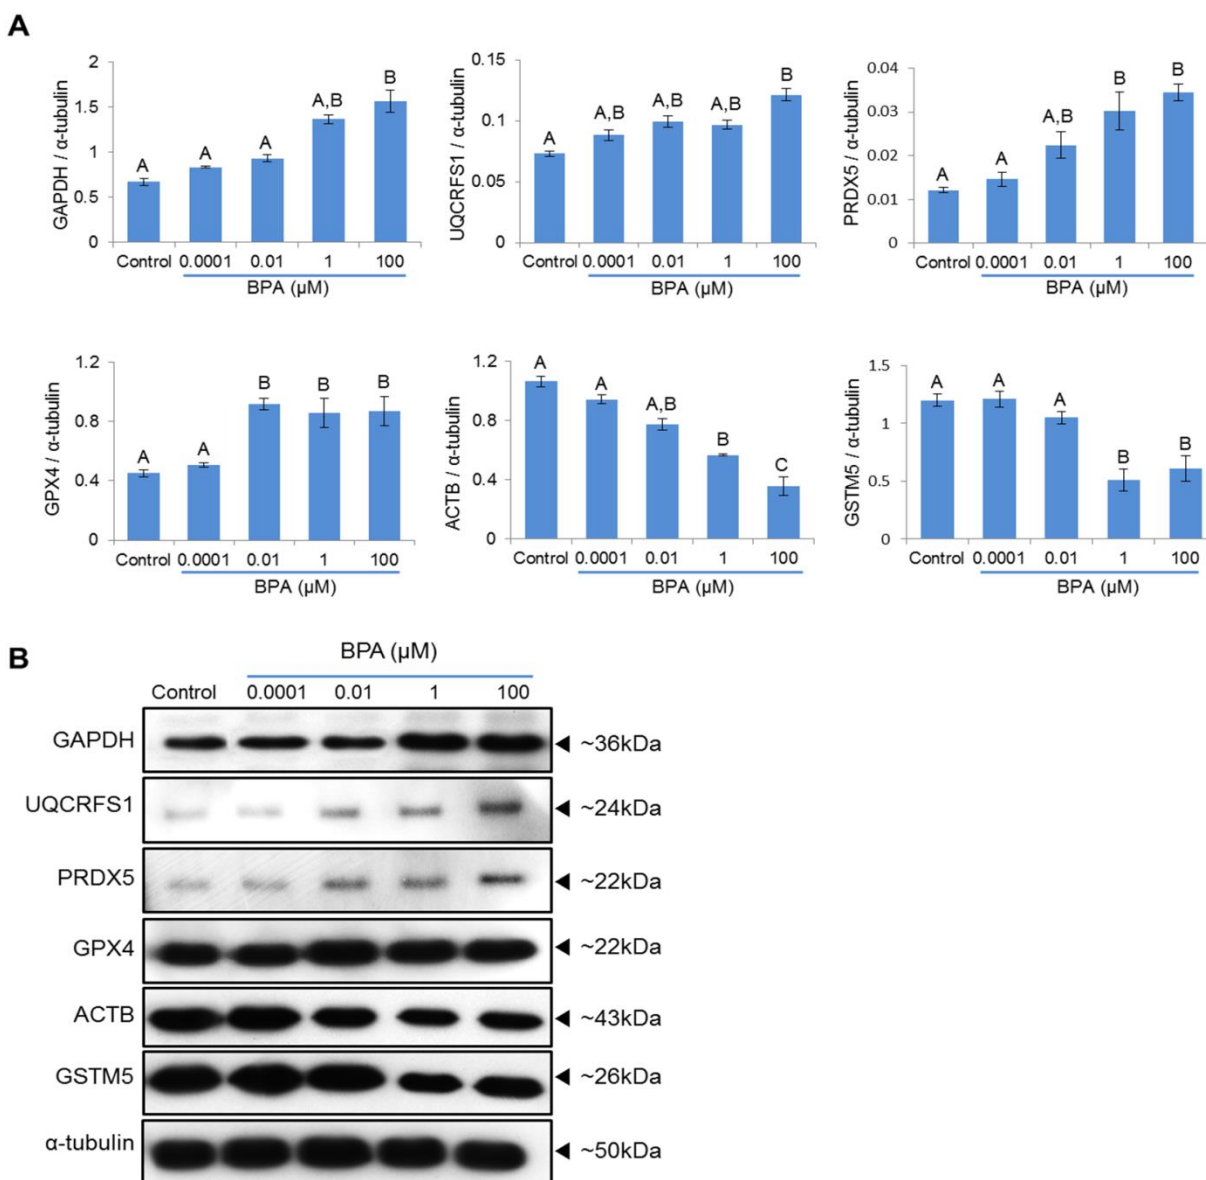

**Fig. S1** Validation of the 2-DE results by western blot analysis. **(A)** The bars represent the densities of particular proteins bands, such as GAPDH, UQCERS1, PRDX5, GPX4, ACTB, and GSTM5. Data are presented as mean  $\pm$  SEM (n=3). Values with different superscript characters (<sup>A,B,C</sup>) indicate significant differences between the control and treatment samples as determined by one-way ANOVA ( $P < 0.05$ ). **(B)** Representative western blot image of GAPDH, UQCERS1, PRDX5, GPX4, ACTB, and GSTM5 probed with the respective antibodies.

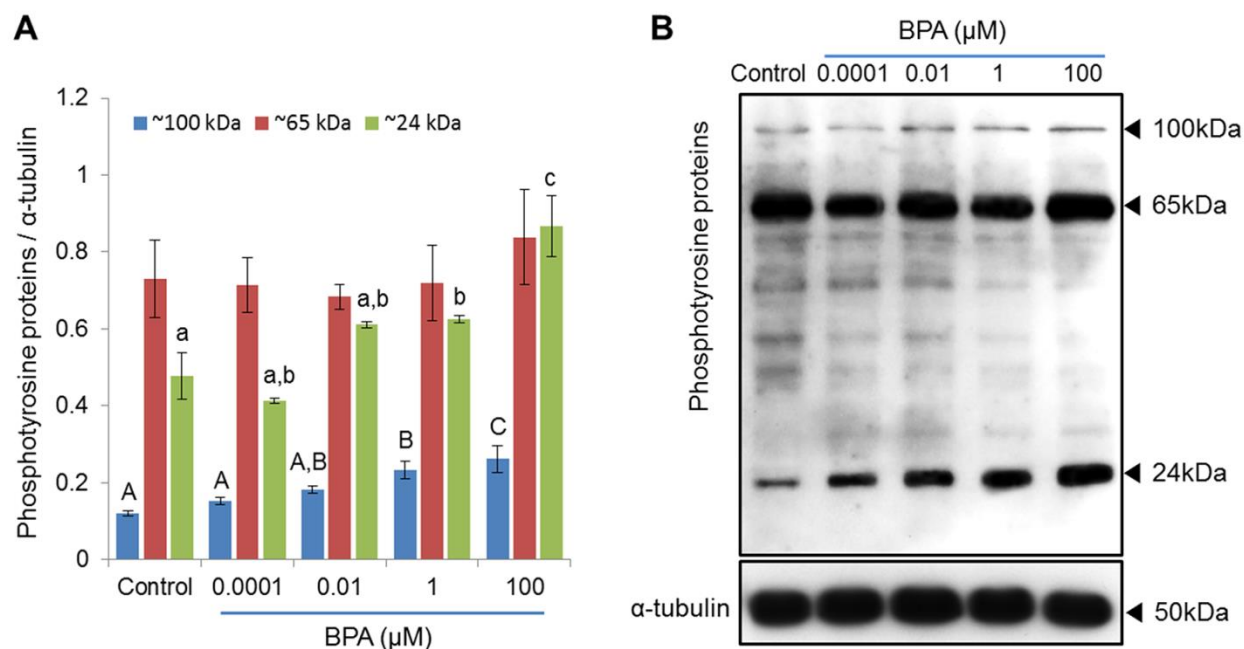

**Fig. S2** Effect of BPA on tyrosine phosphorylation status of spermatozoa. **(A)** Density of phosphotyrosine proteins in control and BPA-treated samples. Data are the mean of four replicates  $\pm$  SEM. Values with different upper and lower case letters (<sup>A,B,C,a,b,c</sup>) are significantly different between control and treatment groups by one-way ANOVA. **(B)** Tyrosine-phosphorylated proteins were probed with PY 20. Lane 1: control; lane 2: 0.0001  $\mu$ M BPA; lane 3: 0.01  $\mu$ M BPA; lane 4: 1  $\mu$ M BPA; and lane 5: 100  $\mu$ M BPA.

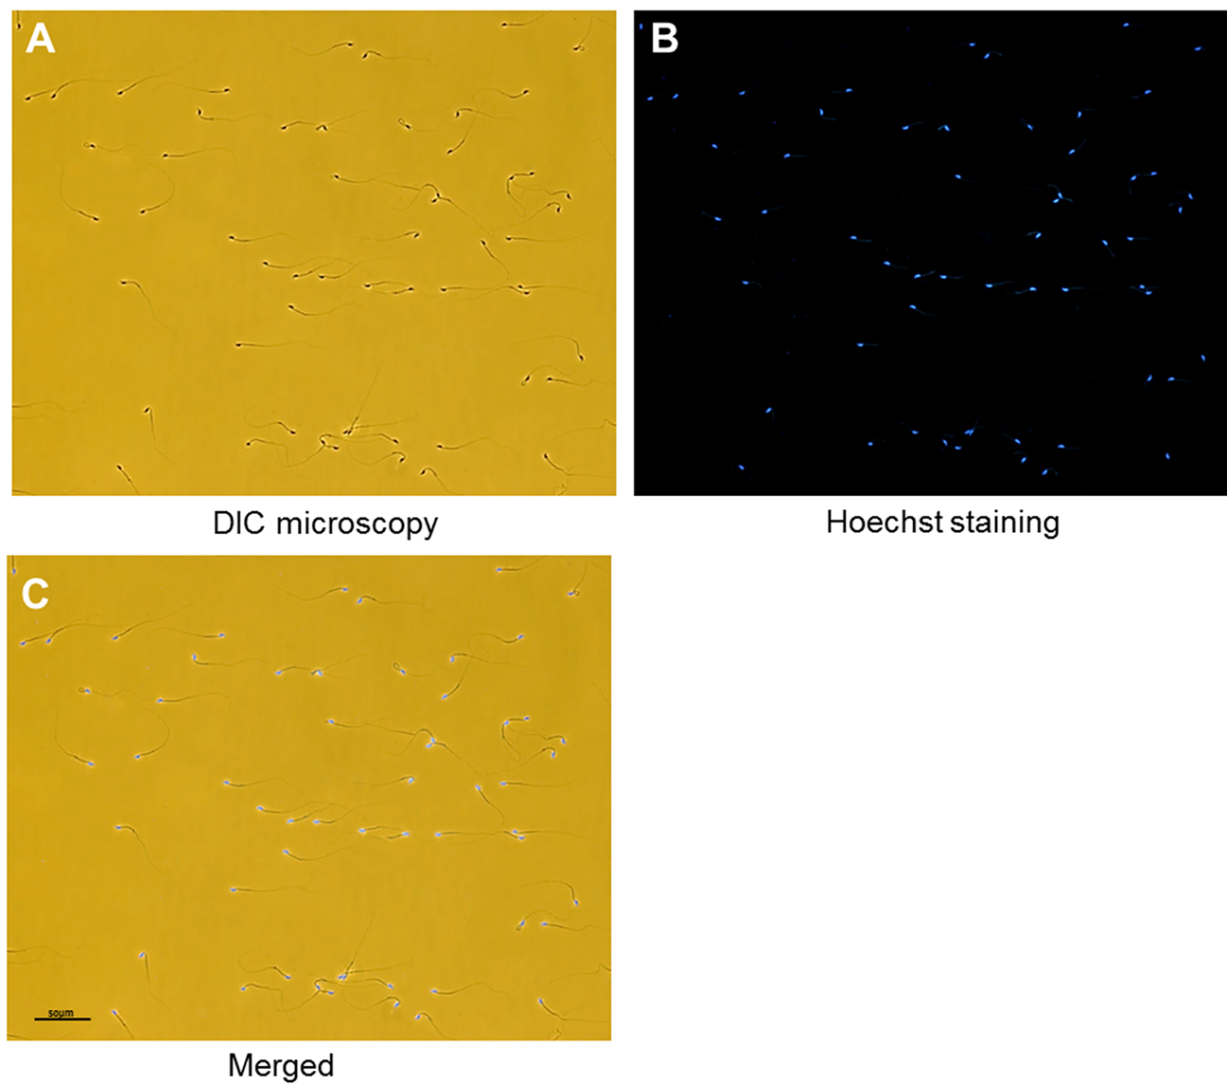

**Fig. S3** Validation of separation technique of spermatozoa for proteomic analysis. Spermatozoa examined for the non-appearance of immature sperm cells and somatic cells using microscopy. **(A)** Differential interference contrast microscopic (DIC) image of spermatozoa used for proteomic analyses. **(B)** Image of hoechst staining spermatozoa. **(C)** Merged image.
